# Supplementary material for: Molecular genetic analysis of FGFR1 signalling reveals distinct roles of MAPK and PLCγ1 activation for self-renewal of adult neural stem cells
Source: PubMed Central journal article supplement (PMC2700800; doi:10.1186/1756-6606-2-16), 2009-06-08

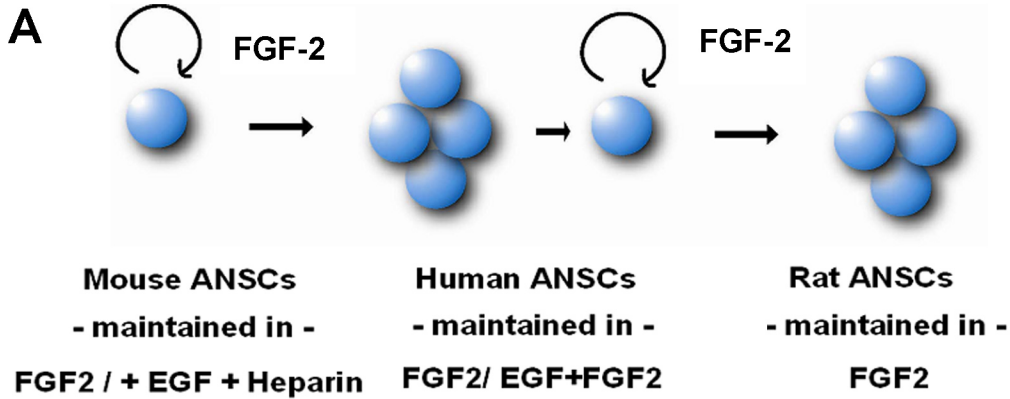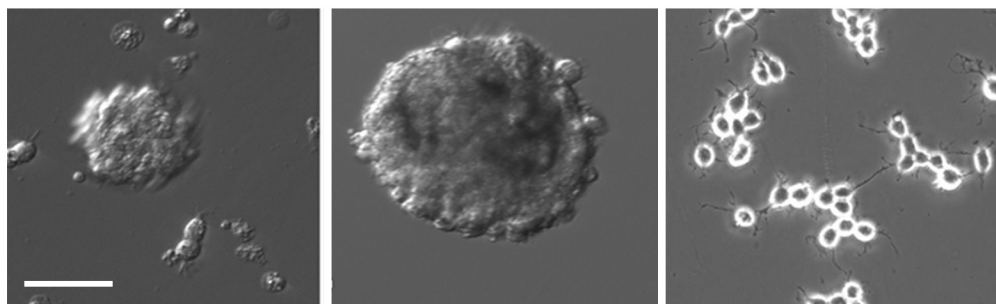

**B**

FGF-2 (20 ng/ml)

N2 medium

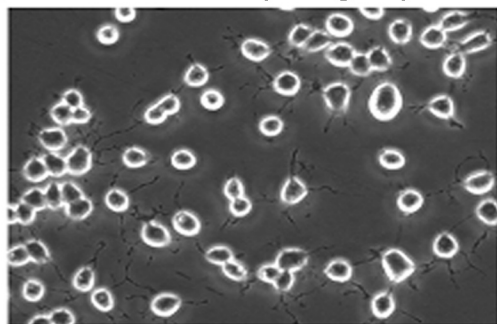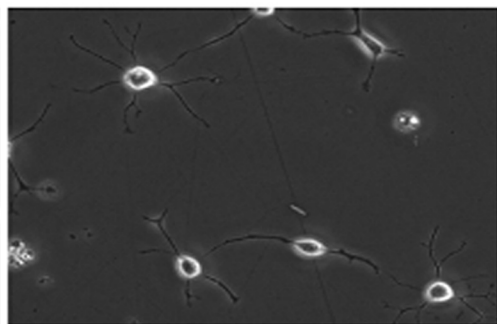

NGF (50 ng/ml)

RA (0.5  $\mu$ M) + FBS (0.5%)

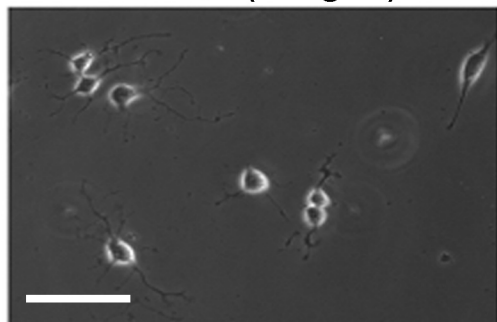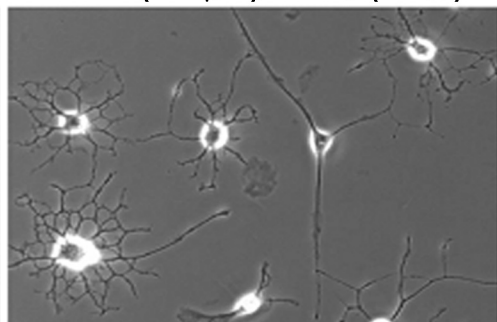

Supplement: 1756-6606-2-16-S1.pdf [file 1756-6606-2-16-S1.pdf]
