# Supplementary material for: Molecular genetic analysis of FGFR1 signalling reveals distinct roles of MAPK and PLCγ1 activation for self-renewal of adult neural stem cells
Source: PubMed Central journal article supplement (PMC2700800; doi:10.1186/1756-6606-2-16), 2009-06-08

**A**

Mixture of WT  
and mutant  
adult NSC

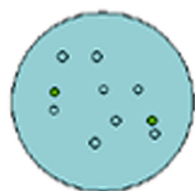

FGF

NGF

Medium

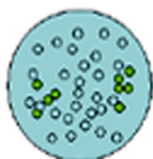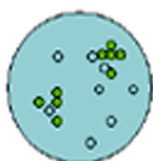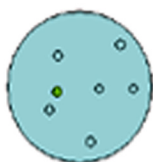

Or: infection with  
low-titer chimeric  
retroviruses

Clonal Composition:  
Multipotentiality

Differentiation  
in RA + FBS

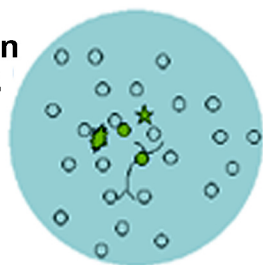

Clonal Size: proliferation

Clonal State: undifferentiated state

**B**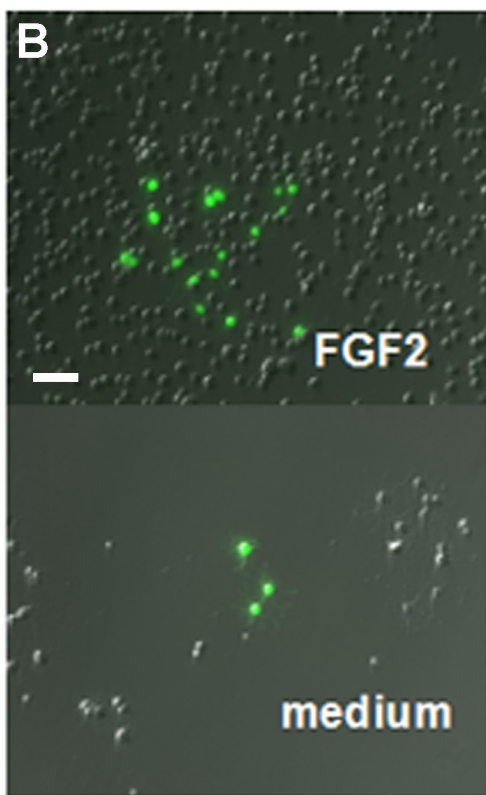**C**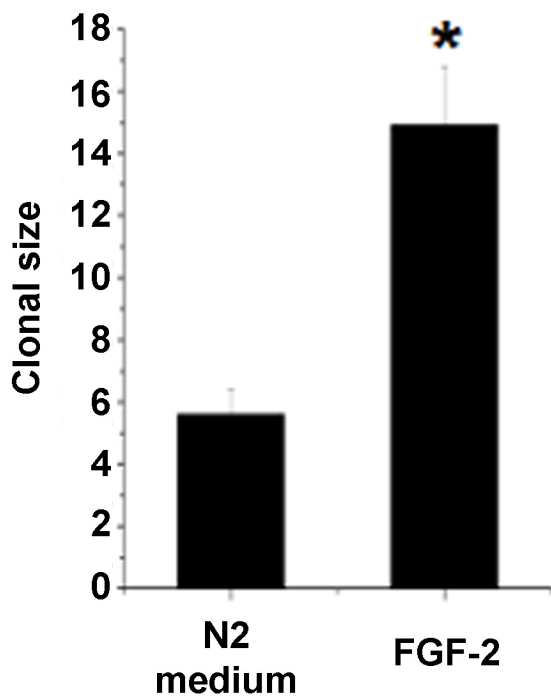

Supplement: 1756-6606-2-16-S2.pdf [file 1756-6606-2-16-S2.pdf]
