# Supplementary material for: Molecular genetic analysis of FGFR1 signalling reveals distinct roles of MAPK and PLCγ1 activation for self-renewal of adult neural stem cells
Source: PubMed Central journal article supplement (PMC2700800; doi:10.1186/1756-6606-2-16), 2009-06-08

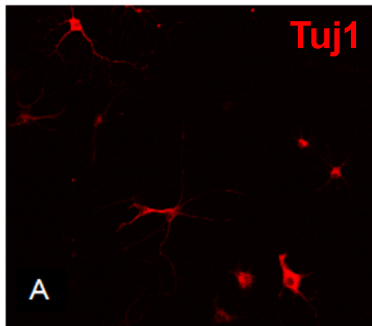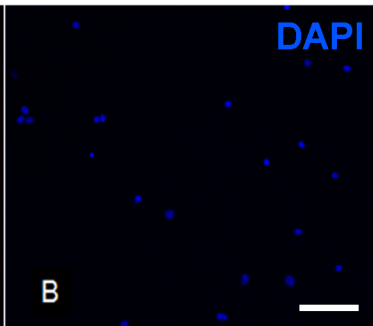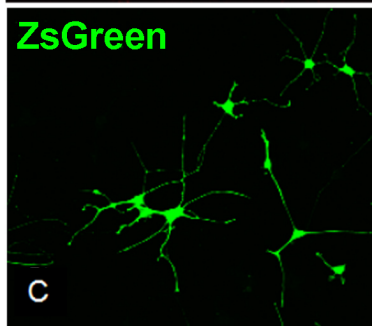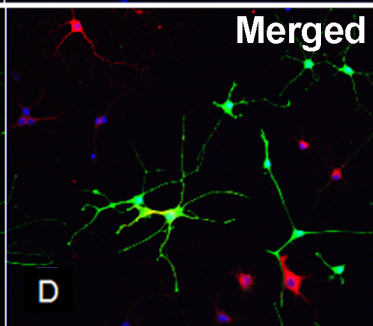

Supplement: 1756-6606-2-16-S3.pdf [file 1756-6606-2-16-S3.pdf]
