# Supplementary material for: Molecular genetic analysis of FGFR1 signalling reveals distinct roles of MAPK and PLCγ1 activation for self-renewal of adult neural stem cells
Source: PubMed Central journal article supplement (PMC2700800; doi:10.1186/1756-6606-2-16), 2009-06-08
Supplement: 1756-6606-2-16-S4.pdf [file 1756-6606-2-16-S4.pdf]

no FGF2

PLC  $\gamma$  1  $\rightarrow$  Erk1/2  
Ca<sup>2+</sup>

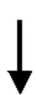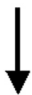

neuronal differentiation  
proliferation

lost self-renewal

FGF2

PLC  $\gamma$  1  
Ca<sup>2+</sup>

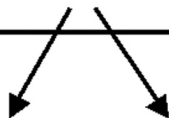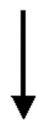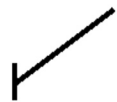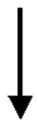

neuronal differentiation  
proliferation

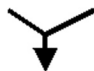

self-renewal &  
multipotentiality
